# Supplementary material
Source: publisher site journal article supplement (https://www.degruyterbrill.com/publication/isbn/9783486843729/downloadAsset/9783486843729_Buchinformation.pdf)
Supplement: Supplementary file 1 [file 9783486843729_Buchinformation.pdf]

## Volkswirtschaftslehre modern

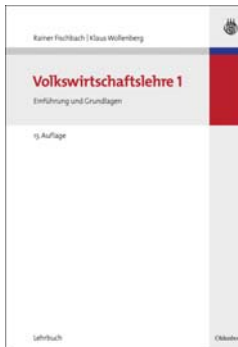

Rainer Fischbach, Klaus Wollenberg

### Volkswirtschaftslehre I

13. Auflage 2007 I XIX I 351 S. I Gb.

€ 29,80

ISBN 978-3-486-58307-6

Aus der Reihe *Managementwissen für Studium und Praxis*

Das Lehrbuch umfasst den Grundlagenstoff, den sich ein Studierender neben anderen speziellen Gebieten bis zur Vor- bzw. Zwischenprüfung aneignen sollte.

Nach einer Einführung in die wichtigsten ökonomischen Grundbegriffe und Denkweisen folgt die Darlegung der Wirtschaftssysteme, d. h. die Analyse der Markt- und Planwirtschaft. Das anschließende „volkswirtschaftliche Rechnungswesen“ untersucht die Kreislaufanalyse, die Sozialproduktberechnung sowie die volkswirtschaftliche Gesamtrechnung.

Breiten Raum nimmt die Mikroökonomik ein. In ihr wird die übliche Nachfrage- und Angebotstheorie sowie die Markt- und Preistheorie als einem Kernstück der Volkswirtschaftslehre entsprechend ausführlich behandelt.

Der Stoff wird didaktisch sinnvoll durch Beispiele aus dem täglichen Leben, Zahlenbeispiele, Übersichten und graphische Darstellungen aufgelockert und so dem Leser leichter zugänglich gemacht.

---

Das Buch richtet sich an Studierende in den Anfangssemestern, vor allem der wirtschaftswissenschaftlichen Fachrichtungen sowie an Praktiker im Beruf und an alle in Aus- und Weiterbildung Stehende.

---

[oldenbourg.de](http://oldenbourg.de)

Oldenbourg Wissenschaftsverlag I Pressereferat I Rosenheimer Str.  
145 81679 München I Tel.: +49 89 45051-467 I Fax: +49 89 45051-292  
I [kuttig@oldenbourg.de](mailto:kuttig@oldenbourg.de)

Alle Veröffentlichungen des Oldenbourg Verlags sind über den Buchhandel zu beziehen. Bei Lieferung fallen Versandgebühren an. Rezensionsexemplare auf Anforderung.
